# Supplementary material for: Transcription-Associated Mutagenesis Increases Protein Sequence Diversity More Effectively than Does Random Mutagenesis in Escherichia coli
Source: PubMed Central journal article supplement (PMC2866735; doi:10.1371/journal.pone.0010567), 2010-05-10

**A**

| Amino acid sequence     |               | M     |       |       | R     |       |       | R     |       |       | R     |       |       | R     |       |       | *     |       |       |
|-------------------------|---------------|-------|-------|-------|-------|-------|-------|-------|-------|-------|-------|-------|-------|-------|-------|-------|-------|-------|-------|
| Protein-coding sequence | Sequence      | A     | T     | G     | A     | G     | G     | C     | G     | A     | C     | G     | C     | C     | G     | G     | T     | A     | A     |
|                         | Z-score of MI | 0.37  | -0.01 | 0.25  | 1.81  | -0.27 | -0.63 | -0.02 | 0.52  | -2.01 | 0.34  | -1.25 | 2.95  | 0.58  | -0.52 | 0.42  | -0.41 | 0.55  | 1.05  |
|                         | Base group    | START |       |       | O     | M     | O     | O     | M     | S     | M     | M     | S     | O     | M     | S     | STOP  |       |       |
| Control #1              | Sequence      | A     | T     | G     | C     | G     | A     | C     | G     | G     | C     | G     | C     | A     | G     | G     | T     | A     | A     |
|                         | Z-score of MI | 0.41  | 0.44  | -0.64 | 0.04  | 1.80  | 0.16  | -0.43 | 0.95  | -0.02 | 0.93  | -0.43 | 0.26  | -1.27 | -1.84 | 0.00  | 0.96  | -0.69 | 0.23  |
|                         | Base group    | START |       |       | O     | M     | S     | O     | M     | S     | M     | M     | S     | O     | M     | O     | STOP  |       |       |
| Control #2              | Sequence      | A     | T     | G     | C     | G     | G     | C     | G     | C     | A     | G     | G     | C     | G     | A     | T     | A     | A     |
|                         | Z-score of MI | -0.59 | 0.52  | -1.72 | -0.04 | -0.35 | -0.27 | 0.21  | -1.16 | -1.30 | 1.32  | 1.53  | 1.06  | 2.12  | -0.16 | -1.09 | 0.59  | -0.30 | -0.50 |
|                         | Base group    | START |       |       | O     | M     | S     | M     | M     | S     | O     | M     | O     | O     | M     | S     | STOP  |       |       |
| Control #3              | Sequence      | A     | T     | G     | C     | G     | G     | A     | G     | G     | C     | G     | C     | C     | G     | A     | T     | A     | A     |
|                         | Z-score of MI | 0.41  | 0.90  | -0.45 | -0.52 | -1.02 | -2.35 | -0.93 | 0.59  | -0.57 | -0.26 | 0.66  | 0.73  | 1.21  | 0.20  | -2.53 | 0.39  | 0.56  | -2.21 |
|                         | Base group    | START |       |       | O     | M     | S     | O     | M     | O     | M     | M     | S     | O     | M     | S     | STOP  |       |       |
| Control #4              | Sequence      | A     | T     | G     | A     | G     | G     | C     | G     | A     | C     | G     | C     | C     | G     | G     | T     | A     | A     |
|                         | Z-score of MI | -0.64 | -0.32 | -0.29 | -2.41 | 0.22  | 0.62  | -2.20 | 2.28  | -1.83 | -0.17 | 0.29  | -1.11 | 1.37  | -1.44 | -0.26 | -1.05 | -1.02 | -0.41 |
|                         | Base group    | START |       |       | O     | M     | O     | O     | M     | S     | M     | M     | S     | O     | M     | S     | STOP  |       |       |

**B**

|                                                             | MI average  |                        |                          |                       |            |
|-------------------------------------------------------------|-------------|------------------------|--------------------------|-----------------------|------------|
|                                                             | Start codon | Base <sub>silent</sub> | Base <sub>missense</sub> | Base <sub>other</sub> | Stop codon |
| Protein-coding sequence                                     | 0.20        | 0.45                   | -0.24                    | 0.44                  | 0.40       |
| Control #1                                                  | 0.07        | 0.13                   | 0.28                     | -0.42                 | 0.17       |
| Control #2                                                  | -0.60       | -0.89                  | 0.01                     | 1.12                  | -0.07      |
| Control #3                                                  | 0.29        | -1.38                  | 0.03                     | -0.20                 | -0.42      |
| Control #4                                                  | -0.42       | -1.07                  | 0.24                     | -0.66                 | -0.83      |
| Rank of protein-coding sequence among all control sequences | 4           | 5                      | 1                        | 4                     | 5          |

**C**

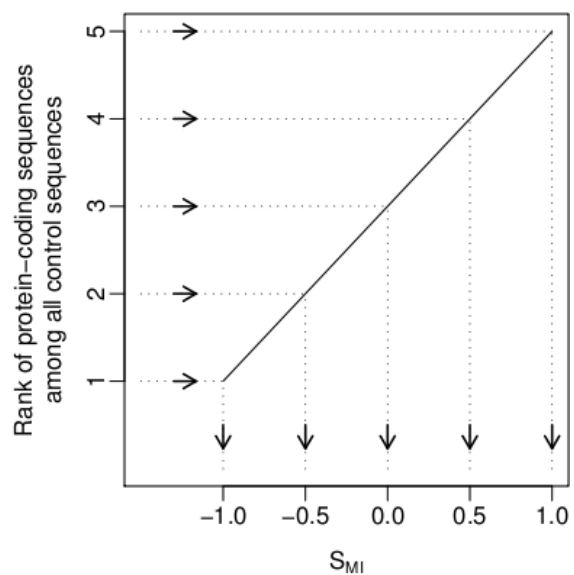

Supplement: pone.0010567.s002.pdf [file pone.0010567.s002.pdf]
