# Supplementary material for: Transcription-Associated Mutagenesis Increases Protein Sequence Diversity More Effectively than Does Random Mutagenesis in Escherichia coli
Source: PubMed Central journal article supplement (PMC2866735; doi:10.1371/journal.pone.0010567), 2010-05-10
Supplement: pone.0010567.s001.pdf [file pone.0010567.s001.pdf]

**A**

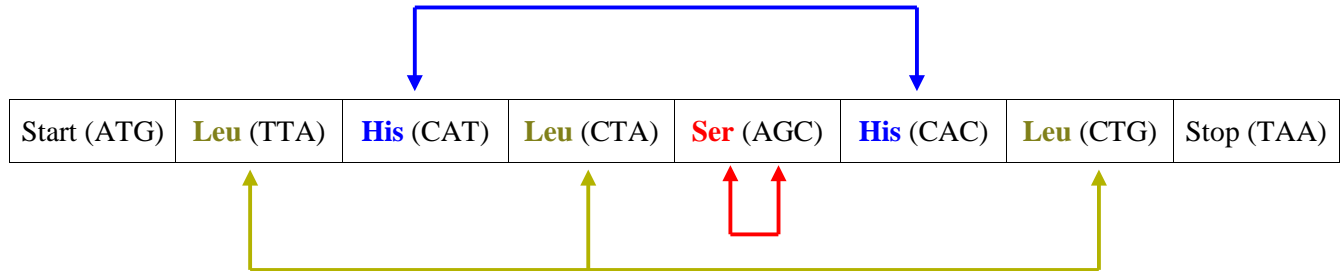

**B**

```
ATGTTACATCTAAGCCACCTGTAA
ATGCTGCACCTAAGCCATTTATAA
ATGCTACATCTGAGCCACTTATAA
ATGCTACACCTGAGCCATTTATAA
ATGTTACATCTGAGCCACCTATAA
ATGCTGCACTTAAGCCATCTATAA
ATGCTACATTTAAGCCACCTGTAA
ATGCTACACTTAAGCCATCTGTAA
ATGTTACACCTAAGCCATCTGTAA
ATGCTGCATTTAAGCCACCTATAA
ATGTTACACCTGAGCCATCTATAA
ATGCTGCATCTAAGCCACTTATAA
```
